# Supplementary material for: Online information on medical cannabis is not always aligned with scientific evidence and may raise unrealistic expectations
Source: J Cannabis Res. 2022 Jul 11;4:37. doi: 10.1186/s42238-022-00145-w (PMC9277882; doi:10.1186/s42238-022-00145-w)
Supplement: Supplementary file 2 — Additional file 2: Spreadsheet with raw data. [file 42238_2022_145_MOESM2_ESM.xlsx]

## Sheet: Sheet1
Rank	URL	link	COUNTRY	Type	Author	Date	References	Owner	JAMA	HON	Research findings	Law/Regulation	Activism	Sells products	Books	Cooking/recipes	Epilepsy	HIV/AIDS	Neoplasias	Anxiety Disorders	Depression	Psychosis/Schizophrenia	Other psychiatric conditions	Sleep disorders	Multiple sclerosis	Parkinson's Disease	Other neurological conditions	Spasticity	Chron Disease/Inflammatory Bowel Disease/Ulcerative colitis	Other gastrointestinal conditions	Anorexia	Increase appetite	Glaucoma	Musculoskeletal disorders	Fybromialgia	Pain	Nausea	Antiinflammatory	Chemotherapy effects	Other	Costs mentioned?	Side effects mentioned?	Position about use	Notes
1	https://www.webmd.com/a-to-z-guides/medical-marijuana-faq	https://www.webmd.com/a-to-z-guides/medical-marijuana-faq	USA	HP	1	1	1	1	4	1	0	1	0	0	0	0	1	1	1	1 (PTSD)	0	1	0	1	1	0	AD	1	1	0	1	1	1	0	0	1	1	1	1	Wasting syndrome (cachexia)	0	1	Neutral	0	0
2	https://www.health.harvard.edu/blog/medical-marijuana-2018011513085	https://www.health.harvard.edu/blog/medical-marijuana-2018011513085	USA	P	1	1	0	1	3	0	0	1	0	0	0	0	1	1	0	1 (PTSD)	0	0	0	1	1	1	0	1	1	0	0	0	1	0	1	1	1	0	0	endometriosis, interstitial cystitis, manage weight loss	0	0	Neutral	0	0
3	https://en.wikipedia.org/wiki/Medical_cannabis	https://en.wikipedia.org/wiki/Medical_cannabis	USA	O	0	1	1	1	3	0	1	1	0	0	0	0	1	1	0	0	0	0	0	1	1	0	Migraine, Tourette syndrome, movement problems	1	0	0	1	1	1	1 (arthritis)	0	1	1	0	1	Improve tics	0	1	Neutral	0	0
4	https://www.drugabuse.gov/publications/drugfacts/marijuana-medicine	https://www.drugabuse.gov/publications/drugfacts/marijuana-medicine	USA	G	0	1	1	1	3	0	1	1	0	0	0	0	1	1	1	0	0	0	mental disorders and addictions/substance use disorder	0	1	0	Brain tumor	1	0	0	0	1	0	0	0	1	1	1	0	0	0	1	Neutral	0	0
6	https://www.medicinenet.com/medical_marijuana_medical_cannabis/article.htm	https://www.medicinenet.com/medical_marijuana_medical_cannabis/article.htm	USA	HP	1	1	0	1	3	1	1	1	0	0	0	0	1	1	1	1	1	1	drug addiction, autism, mood disorders	1	1	1	AD, movement disorders, Huntington's Disease, other neurodegenerative conditions and movement disorders	1	1	0	1	1	0	0	0	1	1	1	1	Overactive bladder, fetal hypoxia, promote neuroplasticity, emotional and cognitive modulation, vascular and digestive function	0	1	Neutral	0	0
7	https://adf.org.au/drug-facts/medical-cannabis/	https://adf.org.au/drug-facts/medical-cannabis/	Australia	NP	0	1	1	1	3	1	0	1	0	0	0	0	1	0	1	1	0	1	drug addiction	1	1	0	0	1	1	0	0	0	0	0	0	1	1	1	0	Diabetes type 2, Antioxidant	0	1	Neutral	0	0
8	https://www.nhs.uk/conditions/medical-cannabis/	https://www.nhs.uk/conditions/medical-cannabis/	UK	G	0	1	0	1	2	0	0	1	0	0	0	0	1	0	0	0	0	0	0	0	1	0	0	1	0	0	0	0	0	0	0	0	1	0	1	0	0	1	Neutral	0	0
9	https://www.medicalmarijuanainc.com/	https://www.medicalmarijuanainc.com/	USA	C	0	0	0	1	1	0	0	1	0	1	0	0	0	0	0	0	0	0	0	0	0	0	0	0	0	0	0	0	0	0	0	0	0	0	0	0	1	1	Positive	Costs mentioned when you click to "Buy" the product	0
10	https://www.healthlinkbc.ca/medications/medical-cannabis	https://www.healthlinkbc.ca/medications/medical-cannabis	Canada	G	0	1	1	1	3	0	0	0	0	0	0	0	0	1	1	0	0	0	0	0	1	0	spinal cord injury	1	0	0	0	1	0	0	0	1	1	0	1	0	0	1	Neutral	0	0
11	http://www.drugpolicy.org/issues/medical-marijuana	http://www.drugpolicy.org/issues/medical-marijuana	USA	NP	0	0	0	1	1	0	0	1	1	0	0	0	1	1	1	0	0	0	0	0	0	0	0	0	0	0	0	0	1	0	1	1	0	0	0	0	0	0	Positive	0	0
13	https://www.theguardian.com/society/2019/jun/24/medical-cannabis-firms-press-uk-to-loosen-prescription-rules	https://www.theguardian.com/society/2019/jun/24/medical-cannabis-firms-press-uk-to-loosen-prescription-rules	UK	N	1	1	0	1	3	0	0	1	0	0	0	0	1	0	0	0	0	0	0	0	0	0	0	0	0	0	0	0	0	0	0	1	1	0	1	0	1	0	Neutral	"Medical cannabis firms press UK to loosen prescription rules" >> Is this activism? Because it's made by companies with financial interests	0
14	http://www.ncsl.org/research/health/state-medical-marijuana-laws.aspx	http://www.ncsl.org/research/health/state-medical-marijuana-laws.aspx	USA	O	0	1	1	1	3	0	1	1	0	0	0	0	1	1	1	1	0	0	autism	0	1	1	Amyotrophic lateral sclerosis, neurodegenerative diseases	1	1	0	0	1	1	0	1	1	1	0	0	mitochondrial disease, Sickle Cell disease, wasting syndrome	0	0	Neutral	0	0
16	https://www.epilepsy.org.uk/info/treatment/cannabis-based-treatments	https://www.epilepsy.org.uk/info/treatment/cannabis-based-treatments	UK	NP	0	0	1	1	2	0	1	1	0	0	0	0	1	0	0	0	0	0	0	0	0	0	0	0	0	0	0	0	0	0	0	0	0	0	0	0	0	1	Neutral	If the website just says that something was concluded by a research but doesn't cyte it, should I mark 1 for 'Research findings?'	0
17	https://nmhealth.org/about/mcp/svcs/	https://nmhealth.org/about/mcp/svcs/	USA	G	0	0	0	1	1	0	0	1	0	0	0	0	0	0	0	0	0	0	0	0	0	0	0	0	0	0	0	0	0	0	0	0	0	0	0	0	0	0	Neutral	Website with information regarding registration of patients to the Medical Cannabis Program of New Mexico. No information is given about medical cannabis.	0
18	https://www.wma.net/policies-post/wma-statement-on-medical-cannabis/	https://www.wma.net/policies-post/wma-statement-on-medical-cannabis/	USA	P	0	1	0	1	2	0	1	1	0	0	0	0	1	1	0	0	0	0	0	0	1	0	0	1	0	0	0	1	0	0	0	1	1	0	0	0	0	1	Neutral	If the website just says that Medical Cannabis is legal/illegal in some country, should I mark 1 for law? If it just says that medical cannabis could treat epilepsy, but doesn't say that it is done controlling seizures, should I mark 1 for 'control seizures'? And also the opposite (if it says that it control seizures , but doesn't cyte the name 'epilepsy'). Note: in case they say that it is used …	0
19	https://www.nidirect.gov.uk/articles/medicinal-cannabis	https://www.nidirect.gov.uk/articles/medicinal-cannabis	UK	G	0	0	0	1	1	0	0	1	0	0	0	0	1	0	0	0	0	0	0	0	1	0	0	1	0	0	0	0	0	0	0	0	1	0	1	0	0	1	Neutral	DOUBT: There is some evidence that some medicinal cannabis products can help certain types of pain, though this evidence is not yet strong enough to recommend it for pain relief.	0
20	https://business.financialpost.com/cannabis/cannabis-health/cannabis-medical/tilray-imports-first-bulk-supply-of-medical-cannabis-to-u-k-after-barriers-lifted-following-public-outcry	https://business.financialpost.com/cannabis/cannabis-health/cannabis-medical/tilray-imports-first-bulk-supply-of-medical-cannabis-to-u-k-after-barriers-lifted-following-public-outcry	Canada	N	1	1	0	1	3	0	0	1	1	0	0	0	1	0	0	0	0	0	0	0	1	0	0	1	0	0	0	0	0	0	0	1	1	0	1	0	0	0	Positive	0	0
26	https://www.ncbi.nlm.nih.gov/pubmed/29938740	https://www.ncbi.nlm.nih.gov/pubmed/29938740	USA	S	1	1	1	1	4	0	1	0	0	0	0	0	0	0	0	1	1	0	0	0	0	0	0	0	0	0	0	0	0	0	0	1	0	0	0	0	0	0	Positive	The article says in the conclusion: "Our study suggest that Cannabis therapy, as an adjun- ct a traditional analgesic therapy, can be an efficacious tool to make more effective the management of chronic pain and its consequences on functional and psychological dimension. Further randomized, controlled trials are needed to confirm our conclusions." - I marked neutral because of the sentence in bol…	0
27	https://mmcc.maryland.gov/	https://mmcc.maryland.gov/	USA	G	0	0	0	1	1	0	0	1	0	0	0	0	0	0	0	0	0	0	0	0	0	0	0	0	0	0	0	0	0	0	0	0	0	0	0	0	0	0	Neutral	Website for application to receive a certification to purchase medical cannabis. It doesn't contain any information regarding medical cannabis.	0
28	https://azdhs.gov/licensing/medical-marijuana/index.php	https://azdhs.gov/licensing/medical-marijuana/index.php	USA	G	0	0	0	1	1	0	0	1	0	0	0	0	0	0	0	0	0	0	0	0	0	0	0	0	0	0	0	0	0	0	0	0	0	0	0	0	0	0	Neutral	Government website talking about laws/regulation. It doesn't bring specific information about the use of medical cannabis.	0
30	https://dhss.delaware.gov/dph/hsp/medmarhome.html	https://dhss.delaware.gov/dph/hsp/medmarhome.html	USA	G	0	0	0	1	1	0	0	1	0	0	0	0	0	0	0	0	0	0	0	0	0	0	0	0	0	0	0	0	0	0	0	0	0	0	0	0	0	0	Neutral	Government website talking about laws/regulation. It doesn't bring specific information about the use of medical cannabis.	0
31	http://www.dph.illinois.gov/topics-services/prevention-wellness/medical-cannabis	http://www.dph.illinois.gov/topics-services/prevention-wellness/medical-cannabis	USA	G	0	0	0	1	1	0	0	1	0	0	0	0	0	0	0	0	0	0	0	0	0	0	0	0	0	0	0	0	0	0	0	0	0	0	0	0	0	0	Neutral	Government website talking about laws/regulation. It doesn't bring specific information about the use of medical cannabis.	0
32	https://www.frontiersin.org/articles/10.3389/fphar.2018.00916/full	https://www.frontiersin.org/articles/10.3389/fphar.2018.00916/full	Switzerland	S	1	1	1	1	4	0	1	1	0	0	0	0	1	0	0	1	1	0	Agitation, impulse, mood swings	1	0	0	0	1	0	gastrointestinal symptoms	0	1	0	0	0	1	1	1	0	dizziness, excessive appetite, fatigue, stress, tremors	0	1	Positive	Although says that those symptoms were diminshed by the use of medical cannabis, the article says that more studies are needed. Does this classify the position as neutral?	0
33	https://www.doh.wa.gov/YouandYourFamily/Marijuana/MedicalMarijuana	https://www.doh.wa.gov/YouandYourFamily/Marijuana/MedicalMarijuana	USA	G	0	0	0	1	1	0	0	1	0	0	0	0	1	1	1	1 (PTSD)	0	0	0	0	1	0	TBI	1	1	0	1	1	1	0	0	1	1	0	0	Hepatitis C, Chronic renal failure	0	0	Neutral	Government website talking about laws/regulation. It doesn't bring specific information about the use of medical cannabis, except for the diseases for which the prescription is legal.	0
34	https://www.economist.com/democracy-in-america/2019/06/24/medical-marijuana-is-not-the-way-out-of-americas-opioid-crisis	https://www.economist.com/democracy-in-america/2019/06/24/medical-marijuana-is-not-the-way-out-of-americas-opioid-crisis	UK	N	1	1	0	1	3	0	1	0	0	0	0	0	1	0	0	0	0	0	0	0	0	0	0	0	0	0	0	0	0	0	0	1	0	0	0	0	0	0	Neutral	0	0
35	https://www.oregon.gov/oha/PH/DISEASESCONDITIONS/CHRONICDISEASE/MEDICALMARIJUANAPROGRAM	https://www.oregon.gov/oha/PH/DISEASESCONDITIONS/CHRONICDISEASE/MEDICALMARIJUANAPROGRAM	USA	G	0	0	0	1	1	0	0	1	0	0	0	0	0	0	0	0	0	0	0	0	0	0	0	0	0	0	0	0	0	0	0	0	0	0	0	0	0	0	Neutral	Government website talking about application process for a medical cannabis program.	0
38	https://www.irishpost.com/news/access-medical-cannabis-now-legal-ireland-new-pilot-scheme-168436	https://www.irishpost.com/news/access-medical-cannabis-now-legal-ireland-new-pilot-scheme-168436	Ireland	N	1	1	0	1	3	0	0	1	0	0	0	0	1	0	0	0	0	0	0	0	1	0	0	1	0	0	0	0	0	0	0	0	1	0	1	0	0	0	Neutral	0	0
40	https://gothamist.com/2019/06/27/medical_cannabis_cuomo_nyc.php	https://gothamist.com/2019/06/27/medical_cannabis_cuomo_nyc.php	USA	N	1	1	0	1	3	0	0	1	0	0	0	0	0	0	0	0	0	0	0	0	0	0	0	0	0	0	0	0	0	0	0	0	0	0	0	0	0	0	Neutral	0	0
41	https://www.kmov.com/news/missourians-can-apply-for-medical-marijuana-cards-on-june/article_3422b820-9901-11e9-8530-67c36bb7393c.html	https://www.kmov.com/news/missourians-can-apply-for-medical-marijuana-cards-on-june/article_3422b820-9901-11e9-8530-67c36bb7393c.html	USA	N	0	1	0	1	2	0	0	1	0	0	0	0	1	1	1	1 (PTSD)	0	0	1 (autism)	0	1	1	AD, Huntington's Disease, migraine, Tourette's Syndrome, Amyotrophic Lateral Sclerosis (ALS),	0	1	Irritable Bowel Syndrome	0	0	1	0	0	1	0	0	0	Sickel cell disease, terminal ilnesses	0	0	Neutral	0	0
42	https://www.coursera.org/learn/medical-cannabis-pain-control	https://www.coursera.org/learn/medical-cannabis-pain-control	USA	P	0	0	0	1	1	0	0	0	0	0	0	0	0	0	0	0	0	0	0	0	0	0	0	0	0	0	0	0	0	0	0	1	0	0	0	0	0	0	Neutral	Website offering course about the use of medical cannabis in pain control	0
45	https://www.health.ny.gov/regulations/medical_marijuana/faq.htm	https://www.health.ny.gov/regulations/medical_marijuana/faq.htm	USA	G	0	0	0	1	1	0	0	1	0	0	0	0	1	1	1	1 (PTSD)	0	0	0	0	1	1	ALS, spinal cord injury, neuropathy, Huntington's Disease	1	1	0	0	0	0	0	0	1	1	0	0	0	0	0	Neutral	When the website talks about costs but doesn't cite any amount, should I mark 1?	0
46	https://doh.dc.gov/sites/default/files/dc/sites/doh/publication/attachments/Medical%20Cannabis%20An%20Introduction%20to%20the%20Biochemistry%20and%20Pharmacology.pdf	https://doh.dc.gov/sites/default/files/dc/sites/doh/publication/attachments/Medical%20Cannabis%20An%20Introduction%20to%20the%20Biochemistry%20and%20Pharmacology.pdf	USA	G	1	0	1	1	3	0	1	1	0	0	0	0	1	1	1	1 (PTSD)	1	0	0	1	0	0	headache	1	0	0	0	1	1	0	0	1	1	1	1	0	1	1	Neutral	0	0
47	https://www.betterhealth.vic.gov.au/health/conditionsandtreatments/medicinal-cannabis	https://www.betterhealth.vic.gov.au/health/conditionsandtreatments/medicinal-cannabis	australia	G	0	1	1	1	3	0	0	1	0	0	0	0	1	0	1	0	0	0	0	0	1	0	0	0	0	0	0	1	0	0	0	1	1	1	0	0	0	0	Neutral	0	0
49	https://medicalmarijuana.procon.org/	https://medicalmarijuana.procon.org/	USA	NP	0	0	1	1	2	0	1	1	0	0	0	0	1	1	1	1	1	0	pre-menstrual syndrome, other mood disorders	0	1	0	AD, migraine, Tourette's syndrome,	1	1	0	0	0	1	1 (arthritis)	0	1	1	0	0	Hepatitis C, asthma, breathing disorders	0	1	Neutral	0	0
50	https://www.pa.gov/guides/pennsylvania-medical-marijuana-program/	https://www.pa.gov/guides/pennsylvania-medical-marijuana-program/	USA	G	0	0	0	1	1	0	0	1	0	0	0	0	1	1	1	1	0	0	autism, opioid use disorder	0	1	1	Movement disorders, brain/spinal cord injury, Huntington's Disease, neurodegenerative disease, neuropathy, Tourette's syndrome, ALS	1	1	0	0	0	1	0	0	1	0	0	0	Sickel cell disease, terminal illness	0	0	Neutral	0	0
55	https://www.epilepsy.ie/content/medical-cannabis	https://www.epilepsy.ie/content/medical-cannabis	Ireland	NP	0	1	1	1	3	0	1	0	0	0	0	0	1	0	0	0	0	0	0	0	1	0	0	1	0	0	0	0	0	0	0	1	1	0	1	0	0	1	Neutral	0	0
56	https://portal.ct.gov/DCP/Medical-Marijuana-Program/Medical-Marijuana-Program	https://portal.ct.gov/DCP/Medical-Marijuana-Program/Medical-Marijuana-Program	USA	G	0	0	0	1	1	0	0	1	0	0	0	0	1	1	1	1	0	0	0	0	1	1	ALS, spinal cord injury, cerebral palsy, chronic radiculopathy, headache, hydrocephalus, degenerative spinal disorders	1	1	0	0	0	1	Osteogenesis imperfecta, muscular dystrophy, psoriatic arthritis	0	1	0	0	0	sickle cell disease, cachexia, wasting syndrome, psoriasis	0	0	Neutral	0	0
57	https://norml.org/legal/medical-marijuana-2	https://norml.org/legal/medical-marijuana-2	USA	NP	0	0	0	1	1	0	0	0	0	0	0	0	0	0	1	0	0	0	0	0	0	0	Movement disorders	1	0	0	0	1	1	0	0	1	1	0	0	0	0	0	Positive	0	0
58	https://www.irishtimes.com/news/health/legislation-allowing-limited-access-to-medical-cannabis-signed-1.3938096	https://www.irishtimes.com/news/health/legislation-allowing-limited-access-to-medical-cannabis-signed-1.3938096	Ireland	N	0	1	0	1	2	0	0	1	0	0	0	0	1	0	0	0	0	0	0	0	1	0	0	0	0	0	0	0	0	0	0	0	1	0	1	0	0	0	Neutral	0	0
59	https://www.sciencedirect.com/topics/medicine-and-dentistry/medical-cannabis	https://www.sciencedirect.com/topics/medicine-and-dentistry/medical-cannabis	Netherlands	S	1	1	1	1	4	0	1	1	0	0	0	0	0	1	1	0	0	0	0	1	0	0	0	0	0	0	1	0	1	0	0	1	0	1	0	Chronic disease	1	1	Neutral	0	0
60	https://www.epilepsy.com/learn/treating-seizures-and-epilepsy/other-treatment-approaches/medical-marijuana-and-epilepsy	https://www.epilepsy.com/learn/treating-seizures-and-epilepsy/other-treatment-approaches/medical-marijuana-and-epilepsy	USA	NP	1	1	1	1	4	0	1	1	0	0	0	0	1	0	0	0	0	0	0	0	0	0	0	0	0	0	0	0	0	0	0	0	0	0	0	0	0	1	Neutral	0	0
61	https://www.pharmacists.ca/advocacy/medical-cannabis/	https://www.pharmacists.ca/advocacy/medical-cannabis/	Canada	P	0	0	1	0	1	0	1	0	0	0	0	0	0	0	0	0	0	0	0	0	0	0	0	0	0	0	0	0	0	0	0	0	0	0	0	0	0	0	Neutral	Website talking about the role of pharmacists in the context of legalization of medical cannabis - it talks about medical uses of cannabis very briefly	0
64	https://www.britannica.com/science/medical-cannabis	https://www.britannica.com/science/medical-cannabis	USA	O	1	1	0	1	3	0	1	1	0	0	0	0	1	0	0	0	0	0	0	0	0	0	0	1	0	0	1	0	0	0	0	1	1	0	0	0	0	1	Neutral	0	0
65	https://www.epmmagazine.com/news/uk-s-first-project-for-medical-cannabis-launches/	https://www.epmmagazine.com/news/uk-s-first-project-for-medical-cannabis-launches/	UK	N	0	1	0	1	2	0	0	0	0	0	0	0	0	0	0	1 (PTSD)	0	0	0	0	1	0	Tourette's syndrome	0	0	0	0	0	0	0	0	1	0	0	0	0	0	0	Neutral	Website talking about a research project to be launched in the UK - I'm in doubt if I should mark or not the diseases	0
66	https://www.investopedia.com/investing/medical-cannabis-stocks-vs-recreational-cannabis-stocks-which-ones-should-you-invest/	https://www.investopedia.com/investing/medical-cannabis-stocks-vs-recreational-cannabis-stocks-which-ones-should-you-invest/	USA	O	1	1	1	1	4	0	1	1	0	0	0	0	1	0	1	0	0	0	1	0	1	0	AD	0	0	0	0	0	0	0	0	1	1	0	0	0	0	0	Neutral	0	0
67	http://jalm.aaccjnls.org/content/2/4/485	http://jalm.aaccjnls.org/content/2/4/485	UK	S	1	1	1	1	4	0	1	0	0	0	0	0	0	0	0	0	0	0	0	0	0	0	0	0	0	0	0	0	0	0	0	1	0	0	0	0	0	0	Neutral	In doubt about marking Pain	0
68	http://omma.ok.gov/	http://omma.ok.gov/	USA	G	0	0	0	1	1	0	0	1	0	0	0	0	0	0	0	0	0	0	0	0	0	0	0	0	0	0	0	0	0	0	0	0	0	0	0	0	0	0	Neutral	Website doesn't bring information about the medical use of cannabis, just about the regulation process to obtain it	0
72	https://www.jamda.com/article/S1525-8610(18)30662-5/fulltext	https://www.jamda.com/article/S1525-8610(18)30662-5/fulltext	USA	S	1	1	1	1	4	0	1	1	0	0	0	0	1	1	1	1	0	0	0	0	1	1	Huntington's Disease, spinal cord injury, neuropathy, ALS	1	1	0	0	0	0	0	0	1	0	1	0	Opioid use	0	1	Positive	0	0
73	https://www.marketwatch.com/story/some-baby-boomers-say-doctors-arent-giving-them-enough-information-about-cannabis-2019-06-03	https://www.marketwatch.com/story/some-baby-boomers-say-doctors-arent-giving-them-enough-information-about-cannabis-2019-06-03	USA	N	1	1	1	1	4	0	1	0	0	0	0	0	0	0	0	1	0	0	0	0	1	0	0	1	0	0	0	0	0	0	0	1	1	0	1	fatigue	0	0	Neutral	0	0
74	https://health.hawaii.gov/medicalcannabis/	https://health.hawaii.gov/medicalcannabis/	USA	G	0	0	0	1	1	0	0	1	0	0	0	0	0	0	0	0	0	0	0	0	0	0	0	0	0	0	0	0	0	0	0	0	0	0	0	0	0	0	Neutral	Website just talks about registry and dispensary programs of medical cannabis	0
75	https://parkinson.org/Understanding-Parkinsons/Treatment/Medical-Marijuana	https://parkinson.org/Understanding-Parkinsons/Treatment/Medical-Marijuana	USA	NP	0	0	1	1	2	0	1	1	0	0	0	0	0	0	0	1	0	0	0	1	0	1	0	0	0	0	0	0	0	0	0	1	1	0	0	weight loss	0	1	Neutral	0	0
76	https://www.pharmacannis.com/il/get-a-medical-cannabis-card	https://www.pharmacannis.com/il/get-a-medical-cannabis-card	USA	C	0	0	0	1	1	0	0	0	0	0	0	0	1	1	1	1	0	0	Autism,	0	1	1	AD, ALS, Chronic Inflammatory Demyelinating Polyneuropathy, spinal cord injury, spinal cord disease, Spinocerebellar Ataxia, Syringomyelia, Hydrocephalus, Hydromyelia, Arnold-Chiari Malformation, Dystonia, migraine, Myasthenia Gravis, Tourette Syndrome, Traumatic brain injury, Tarlov Cysts, Neurofibromatosis, Neuropathy, Post-Concussion Syndrome	0	1	0	1	0	1	Fibrous Dysplasia,Rheumatoid Arthritis, Myoclonus, Nail-patella Syndrome, Muscular Dystrophy, Osteoarthritis	1	1	0	0	0	Cachexia, Superior Canal Dehiscence Syndrome, Hepatitis C, Ehlers-Danlos Syndrome, Interstitial Cystitis, Sjogren’s Syndrome, Lupus, Reflex sympathetic dystrophy,Polycystic Kidney Disease, Neuro-Behcet's Autoimmune Disease	0	0	Positive	Website of a cannabis dispensary	0
78	https://arthritis.ca/treatment/medication/medical-cannabis	https://arthritis.ca/treatment/medication/medical-cannabis	Canada	NP	0	0	1	1	2	0	0	0	0	0	0	0	0	0	0	0	0	0	0	0	1	0	0	1	0	0	0	0	0	Arthritis	0	1	1	0	1	0	0	0	Neutral	0	0
79	https://www.tsa.gov/travel/security-screening/whatcanibring/items/medical-marijuana	https://www.tsa.gov/travel/security-screening/whatcanibring/items/medical-marijuana	USA	G	0	0	0	1	1	0	0	1	0	0	0	0	0	0	0	0	0	0	0	0	0	0	0	0	0	0	0	0	0	0	0	0	0	0	0	0	0	0	Neutral	Website talking about regulation of transportation of cannabinoid products	0
80	https://health.gov.ie/wp-content/uploads/2018/08/Medicinal-Cannabis-Document-for-Publication-August-2018.pdf	https://health.gov.ie/wp-content/uploads/2018/08/Medicinal-Cannabis-Document-for-Publication-August-2018.pdf	Ireland	G	0	0	1	0	1	0	1	1	0	0	0	0	1	0	0	0	0	0	0	0	1	0	0	1	0	0	0	0	0	0	0	0	1	0	1	0	0	0	Neutral	0	0
88	https://www.dav.org/veterans/resources/medical-cannabis/	https://www.dav.org/veterans/resources/medical-cannabis/	USA	NP	0	0	1	1	2	0	0	1	0	0	0	0	0	0	1	0	0	0	0	0	1	0	Brain injury and seizures	0	0	0	0	0	1	0	0	1	1	0	0	Mental disorders	0	0	Positive	0	0
90	https://www.mssociety.org.uk/about-ms/treatments-and-therapies/cannabis	https://www.mssociety.org.uk/about-ms/treatments-and-therapies/cannabis	UK	NP	0	0	0	1	1	0	0	1	0	0	0	0	0	0	0	0	0	0	0	0	1	0	0	1	0	0	0	0	0	0	0	0	0	0	0	0	0	0	Positive	0	0
91	https://www.tga.gov.au/access-medicinal-cannabis-products-1	https://www.tga.gov.au/access-medicinal-cannabis-products-1	Australia	G	0	1	0	1	2	0	0	1	0	0	0	0	1	0	0	0	0	0	0	0	0	0	0	0	0	0	1	1	0	0	0	1	1	0	0	0	0	0	Neutral	0	0
92	http://www.nationalmssociety.org/Treating-MS/Complementary-Alternative-Medicines/Marijuana/Marijuana-FAQs	http://www.nationalmssociety.org/Treating-MS/Complementary-Alternative-Medicines/Marijuana/Marijuana-FAQs	USA	NP	0	0	1	1	2	0	1	0	0	0	0	0	0	1	0	0	0	0	0	0	0	0	0	1	0	0	0	1	0	0	0	1	1	0	0	Urinary incontinence	0	1	Positive	0	0
93	https://www.reuters.com/article/us-swiss-cannabis/switzerland-aims-to-legalise-medical-marijuana-idUSKCN1TR13N	https://www.reuters.com/article/us-swiss-cannabis/switzerland-aims-to-legalise-medical-marijuana-idUSKCN1TR13N	UK	N	1	1	0	1	3	0	0	1	0	0	0	0	0	0	1	0	0	0	0	0	1	0	0	1	0	0	0	1	0	0	0	1	0	0	0	0	0	0	Neutral	0	0
94	https://www.app.com/story/news/local/new-jersey/marijuana/2019/06/27/nj-medical-marijuana-dispensary-legal-weed-phil-murphy/1476048001/	https://www.app.com/story/news/local/new-jersey/marijuana/2019/06/27/nj-medical-marijuana-dispensary-legal-weed-phil-murphy/1476048001/	USA	N	1	1	0	1	3	0	0	1	0	0	0	0	0	0	0	0	0	0	0	0	0	0	0	0	0	0	0	0	0	0	0	0	0	0	0	0	0	0	Neutral	News about New Jersey's legal aspects	0
95	https://www.nature.com/articles/d41586-019-01971-4	https://www.nature.com/articles/d41586-019-01971-4	UK	S	1	1	1	1	4	0	1	0	0	0	0	0	0	0	0	0	0	0	0	0	0	0	0	0	0	0	0	0	0	0	0	0	0	0	0	0	0	0	Neutral	Statement of a researcher that deffends the necessite of study in gene mutation properties of Cannabis	0
96	https://www.joe.ie/news/access-medical-cannabis-now-allowed-ireland-new-programme-672530	https://www.joe.ie/news/access-medical-cannabis-now-allowed-ireland-new-programme-672530	Ireland	N	1	0	0	1	2	0	0	1	0	0	0	0	1	0	0	0	0	0	0	0	1	0	0	1	0	0	0	0	0	0	0	0	1	0	0	0	1	0	Neutral	0	0
97	https://marketrealist.com/2019/06/european-market-medical-cannabis-is-heating-up/	https://marketrealist.com/2019/06/european-market-medical-cannabis-is-heating-up/	USA	N	1	1	0	1	3	0	0	1	0	0	0	0	0	0	0	0	0	0	0	0	0	0	0	0	0	0	0	0	0	0	0	0	0	0	0	0	0	0	Neutral	Analysis of world scenario of Cannabis legalization (newspaper for investors)	0
98	https://kfor.com/2019/06/26/one-year-in-oklahoma-medical-marijuana-user-numbers-top-states/	https://kfor.com/2019/06/26/one-year-in-oklahoma-medical-marijuana-user-numbers-top-states/	USA	N	1	1	0	1	3	0	0	1	0	0	0	0	0	0	0	0	0	0	0	0	0	0	0	0	0	0	0	0	0	0	0	0	0	0	0	0	0	0	Neutral	Analysis of Oklahomas reality after 1 year of legalization	0
99	https://www.kshb.com/news/local-news/grandview-kansas-city-among-municipalities-tackling-medical-cannabis-dispensary-regulations-early	https://www.kshb.com/news/local-news/grandview-kansas-city-among-municipalities-tackling-medical-cannabis-dispensary-regulations-early	USA	N	1	1	0	1	3	0	0	1	0	0	0	0	0	0	0	0	0	0	0	0	0	0	0	0	0	0	0	0	0	0	0	0	0	0	0	0	0	0	Neutral	News about Missouri's legal aspects	0
100	http://idahonews.com/news/local/medical-marijuana-petition-filed-for-2020-idaho-ballot	http://idahonews.com/news/local/medical-marijuana-petition-filed-for-2020-idaho-ballot	USA	N	0	1	0	1	2	0	0	1	0	0	0	0	0	0	0	0	0	0	0	0	0	0	0	0	0	0	0	0	0	0	0	0	0	0	0	0	0	0	Neutral	News about Idaho's legal aspects	0
101	https://fox4kc.com/2019/06/25/prospective-entrepreneurs-patients-and-caregivers-learn-rules-for-medical-marijuana-in-missouri/	https://fox4kc.com/2019/06/25/prospective-entrepreneurs-patients-and-caregivers-learn-rules-for-medical-marijuana-in-missouri/	USA	N	1	1	0	1	3	0	0	1	0	0	0	0	0	0	0	0	0	0	0	0	0	0	0	0	0	0	0	0	0	0	0	0	0	0	0	0	0	0	Neutral	News about Missouri's legal aspects	0
102	https://www.kansascity.com/news/business/health-care/article231899753.html	https://www.kansascity.com/news/business/health-care/article231899753.html	USA	N	1	1	0	1	3	0	0	1	0	0	0	0	0	0	0	0	0	0	0	0	0	0	0	0	0	0	0	0	0	0	0	0	0	0	0	0	0	0	Neutral	News about Missouri's legal aspects	0
103	https://www.mayoclinic.org/healthy-lifestyle/consumer-health/in-depth/medical-marijuana/art-20137855	https://www.mayoclinic.org/healthy-lifestyle/consumer-health/in-depth/medical-marijuana/art-20137855	USA	P	0	0	0	1	1	1	1	1	0	0	0	0	1	1	0	0	0	0	Tourettes syndrome	0	1	0	Amyotrophic Lateral Sclerosis	1	1	0	1	1	1	0	0	1	1	0	1	0	0	1	Positive	0	0
106	https://www.medscape.com/viewarticle/912624	https://www.medscape.com/viewarticle/912624	USA	HP	1	1	1	1	4	0	1	0	0	0	0	0	0	0	0	1	0	0	0	1	1	1	Neuropathy, spinal cord damage and Amyotrophic Lateral Sclerosis	0	0	0	0	0	0	0	0	1	0	0	0	0	0	1	Neutral	0	0
107	https://www.wired.co.uk/article/medical-cannabis-nhs-prescription	https://www.wired.co.uk/article/medical-cannabis-nhs-prescription	UK	N	1	1	0	1	3	0	0	1	0	0	0	0	0	0	0	0	0	0	0	0	0	0	0	0	0	0	0	0	0	0	0	0	0	0	0	0	0	0	Neutral	News about United Kingdom's legal aspects	0
108	https://www.news-leader.com/story/news/local/ozarks/2019/06/25/medical-marijuana-missouri-health-officials-tease-dispensary-locations-map/1559152001/	https://www.news-leader.com/story/news/local/ozarks/2019/06/25/medical-marijuana-missouri-health-officials-tease-dispensary-locations-map/1559152001/	USA	N	1	1	0	1	3	0	0	0	0	0	0	0	0	0	0	0	0	0	0	0	0	0	0	0	0	0	0	0	0	0	0	0	0	0	0	0	0	0	Neutral	News about Missouri's legal aspects	0
109	https://connectingvets.radio.com/articles/bill-expand-medical-marijuana-access-veterans-pulled-vote	https://connectingvets.radio.com/articles/bill-expand-medical-marijuana-access-veterans-pulled-vote	USA	N	1	1	0	1	3	0	0	1	0	0	0	0	0	0	0	1	0	0	Post Traumatic Stress Disorder	0	0	0	0	0	0	0	0	0	0	0	0	1	0	0	0	0	0	0	Neutral	0	0
110	https://www.todayfm.com/news/medical-cannabis-ireland-875789	https://www.todayfm.com/news/medical-cannabis-ireland-875789	Ireland	N	1	1	0	1	3	0	0	1	0	0	0	0	1	0	0	0	0	0	0	0	1	0	0	1	0	0	0	0	0	0	0	0	1	0	1	0	0	0	Neutral	0	0
111	https://www.independent.ie/irish-news/health/access-to-medical-cannabis-products-eased-38258208.html	https://www.independent.ie/irish-news/health/access-to-medical-cannabis-products-eased-38258208.html	Ireland	N	1	1	0	1	3	0	0	1	0	0	0	0	1	0	0	0	0	0	0	0	1	0	0	1	0	0	0	0	0	0	0	0	1	0	1	0	0	0	Neutral	0	0
113	https://www.newstalk.com/news/medical-cannabis-pilot-scheme-875721	https://www.newstalk.com/news/medical-cannabis-pilot-scheme-875721	Ireland	N	1	1	0	1	3	0	0	1	0	0	0	0	1	0	0	0	0	0	0	0	1	0	0	1	0	0	0	0	0	0	0	0	1	0	1	0	0	0	Neutral	0	0
114	https://www.delawareonline.com/story/news/2019/06/25/legislators-propose-medical-marijuana-anxiety-letting-users-grow/1567082001/	https://www.delawareonline.com/story/news/2019/06/25/legislators-propose-medical-marijuana-anxiety-letting-users-grow/1567082001/	USA	N	1	1	0	1	3	0	0	1	0	0	0	0	0	1	1	1	0	0	Post Traumatic Stress Disorder	0	0	0	0	0	0	0	0	0	0	0	0	0	0	0	0	0	0	0	Neutral	0	0
115	https://www.pnas.org/content/early/2019/06/04/1903434116	https://www.pnas.org/content/early/2019/06/04/1903434116	USA	S	1	1	1	1	4	0	1	1	0	0	0	0	0	0	0	0	0	0	0	0	0	0	0	0	0	0	0	0	0	0	0	0	0	0	0	0	0	0	Neutral	Article that contrast the relation between cannabis legislation and opiods consumption	0
116	https://www.ktvb.com/article/news/politics/elections/group-files-initiative-petition-to-legalize-medical-marijuana-in-idaho/277-bd344752-9079-423b-97c0-837850572bb7	https://www.ktvb.com/article/news/politics/elections/group-files-initiative-petition-to-legalize-medical-marijuana-in-idaho/277-bd344752-9079-423b-97c0-837850572bb7	USA	N	1	1	0	1	3	0	0	1	0	0	0	0	0	0	0	0	0	0	0	0	0	0	0	0	0	0	0	0	0	0	0	0	0	0	0	0	0	0	Neutral	News about Idaho's legal aspects	0
117	https://www.imt.ie/news/minister-no-liability-access-medical-cannabis-programme-26-06-2019/	https://www.imt.ie/news/minister-no-liability-access-medical-cannabis-programme-26-06-2019/	Ireland	N	1	1	0	1	3	0	0	1	0	0	0	0	1	0	0	0	0	0	0	0	1	0	0	1	0	0	0	0	0	0	0	0	1	0	1	0	0	0	Negative	0	0
118	https://www.deseretnews.com/article/900077121/medical-marijuana-growers-limited-licenses-utah.html	https://www.deseretnews.com/article/900077121/medical-marijuana-growers-limited-licenses-utah.html	USA	N	1	1	0	1	3	0	0	1	0	0	0	0	0	0	0	0	0	0	0	0	0	0	0	0	0	0	0	0	0	0	0	0	0	0	0	0	0	0	Neutral	News about Utah's legal aspects	0
119	https://www.haaretz.com/opinion/.premium-medical-marijuana-israel-s-next-big-export-or-pipe-dream-1.7415732	https://www.haaretz.com/opinion/.premium-medical-marijuana-israel-s-next-big-export-or-pipe-dream-1.7415732	Israel	N	1	1	0	1	3	0	0	1	0	0	0	0	1	0	0	1	0	0	Post Traumatic Stress Disorder	1	0	0	0	0	0	0	0	0	0	0	0	1	0	0	0	0	0	0	Neutral	0	0
120	https://www.lawsociety.ie/gazette/top-stories/access-to-medicinal-cannabis-now-allowed-under-irish-law/	https://www.lawsociety.ie/gazette/top-stories/access-to-medicinal-cannabis-now-allowed-under-irish-law/	Ireland	N	0	1	0	1	2	0	0	1	0	0	0	0	1	0	0	0	0	0	0	0	1	0	0	1	0	0	0	0	0	0	0	0	1	0	1	0	0	0	Neutral	0	0
121	https://www.whsv.com/content/news/West-Virginia-medical-cannabis-program-not-ready-to-roll-out-511840861.html	https://www.whsv.com/content/news/West-Virginia-medical-cannabis-program-not-ready-to-roll-out-511840861.html	USA	N	0	1	1	1	3	0	0	1	0	0	0	0	0	0	0	0	0	0	0	0	0	0	0	0	0	0	0	0	0	0	0	0	0	0	0	0	0	0	Neutral	News about West Virginia's legal aspects	0
122	https://www.irishlegal.com/article/legislation-to-permit-access-to-medical-cannabis-approved	https://www.irishlegal.com/article/legislation-to-permit-access-to-medical-cannabis-approved	Ireland	N	0	1	0	1	2	0	0	1	0	0	0	0	1	0	0	0	0	0	0	0	1	0	0	0	0	0	0	0	0	0	0	0	1	0	1	0	0	0	Neutral	0	0
124	https://www.theatlantic.com/health/archive/2019/06/medical-marijuana-probably-wont-stop-opioid-crisis/591355/	https://www.theatlantic.com/health/archive/2019/06/medical-marijuana-probably-wont-stop-opioid-crisis/591355/	USA	N	1	1	0	1	3	0	1	0	0	0	0	0	0	0	0	0	0	0	0	0	0	0	0	0	0	0	0	0	0	0	0	1	0	0	0	0	0	0	Neutral	News about article that contrast the relation between cannabis legislation and opiods consumption	0
125	https://www.businesslive.co.za/bd/world/2019-06-26-switzerland-seeks-to-make-medical-marijuana-more-easily-available/	https://www.businesslive.co.za/bd/world/2019-06-26-switzerland-seeks-to-make-medical-marijuana-more-easily-available/	South Africa	N	1	1	0	1	3	0	0	1	0	0	0	0	0	0	0	0	0	0	0	0	1	0	0	1	0	0	1	1	0	0	0	1	0	0	0	0	0	0	Neutral	0	0
126	https://www.mycentraljersey.com/story/news/local/hunterdon-county/2019/06/26/nj-medical-marijuana-flemington-endorses-dispensary-borough/1558315001/	https://www.mycentraljersey.com/story/news/local/hunterdon-county/2019/06/26/nj-medical-marijuana-flemington-endorses-dispensary-borough/1558315001/	USA	N	1	1	0	1	3	0	0	1	0	0	0	0	0	0	0	0	0	0	0	0	0	0	0	0	0	0	0	0	0	0	0	1	0	0	0	0	0	0	Neutral	0	0
127	http://wicklownews.net/2019/06/harris-signs-legislation-to-allow-medical-cannabis-access-programme/	http://wicklownews.net/2019/06/harris-signs-legislation-to-allow-medical-cannabis-access-programme/	Ireland	N	1	1	0	1	3	0	0	0	0	0	0	0	1	0	0	0	0	0	0	0	1	0	0	1	0	0	0	0	0	0	0	0	1	0	1	0	0	0	Neutral	0	0
128	https://www.thesun.ie/news/4258688/medical-cannabis-ireland-new-pilot-scheme/	https://www.thesun.ie/news/4258688/medical-cannabis-ireland-new-pilot-scheme/	Ireland	N	1	1	0	1	3	0	0	1	0	0	0	0	1	0	0	0	0	0	0	0	1	0	0	0	0	0	0	0	0	0	0	0	1	0	1	0	0	0	Neutral	0	0
129	https://www.ozarksfirst.com/local-news/local-news-local-news/cox-and-mercy-out-on-medical-cannabis-what-now/	https://www.ozarksfirst.com/local-news/local-news-local-news/cox-and-mercy-out-on-medical-cannabis-what-now/	USA	N	0	1	0	1	2	0	0	1	0	0	0	0	0	0	0	0	0	0	0	0	0	0	0	0	0	0	0	0	0	0	0	0	0	0	0	0	0	0	Negative	News about Missouri's legal aspects	0
131	https://volteface.me/feature/the-search-for-medicinal-cannabis/	https://volteface.me/feature/the-search-for-medicinal-cannabis/	UK	NP	1	1	0	0	2	0	0	1	0	0	0	0	1	0	0	0	0	0	0	0	1	0	0	0	1	0	0	0	0	0	0	1	0	0	0	0	0	0	Positive	0	0
132	https://www.buzz.ie/health-fitness/medical-cannabis-program-330591	https://www.buzz.ie/health-fitness/medical-cannabis-program-330591	Ireland	N	1	1	0	1	3	0	0	1	0	0	0	0	1	0	0	0	0	0	0	0	1	0	0	0	0	0	0	0	0	0	0	0	1	0	1	0	0	0	Positive	0	0
133	https://www.insurancejournal.com/news/southeast/2019/06/28/530744.htm	https://www.insurancejournal.com/news/southeast/2019/06/28/530744.htm	USA	N	0	1	0	1	2	0	0	1	0	0	0	0	0	0	0	0	0	0	0	0	0	0	0	0	0	0	0	0	0	0	0	0	0	0	0	0	0	0	Neutral	News about West Virginia's legal aspects	0
134	https://www.hrdive.com/news/a-fast-faq-on-medical-marijuana-and-cbd-products-in-the-workplace/557697/	https://www.hrdive.com/news/a-fast-faq-on-medical-marijuana-and-cbd-products-in-the-workplace/557697/	USA	N	1	1	0	1	3	0	0	1	0	0	0	0	0	0	0	1	1	0	0	0	0	0	0	0	0	0	0	0	0	0	0	1	0	0	0	0	0	0	Neutral	0	0
135	http://heraldtribune.com/news/20190628/sarasota-forum-shows-medical-cannabis-not-just-business---its-personal	http://heraldtribune.com/news/20190628/sarasota-forum-shows-medical-cannabis-not-just-business---its-personal	USA	N	1	1	0	1	3	0	0	1	0	0	0	0	0	0	1	1	0	0	0	1	0	0	0	0	0	0	0	0	0	0	0	1	0	0	0	0	0	0	Neutral	0	0
136	https://www.standardmedia.co.ke/article/2001331640/switzerland-aims-to-legalise-medical-marijuana	https://www.standardmedia.co.ke/article/2001331640/switzerland-aims-to-legalise-medical-marijuana	Kenya	N	1	1	0	1	3	0	0	1	0	0	0	0	0	0	1	0	0	0	0	0	1	0	0	1	0	0	1	1	0	0	0	1	0	0	0	0	0	0	Neutral	0	0
138	https://www.bmj.com/content/362/bmj.k3357	https://www.bmj.com/content/362/bmj.k3357	UK	S	1	1	1	1	4	0	1	1	0	0	0	0	1	0	0	1	0	0	Dementia, PTSD, Tourette's syndrome	1	0	1	0	1	0	0	0	1	1	0	1	1	1	0	1	Urinary Incontinence	0	1	Neutral	0	0
140	https://www.benzinga.com/markets/cannabis/19/06/13986076/study-association-between-medical-marijuana-opioid-deaths-could-be-spurious	https://www.benzinga.com/markets/cannabis/19/06/13986076/study-association-between-medical-marijuana-opioid-deaths-could-be-spurious	USA	N	1	1	1	1	4	0	1	0	0	0	0	0	0	0	0	0	0	0	0	0	0	0	0	0	0	0	0	0	0	0	0	0	0	0	0	0	0	0	Neutral	Comparison of two articles that contrast the relation between cannabis legislation and opiods consumption	0
141	https://www.heraldextra.com/news/state-and-regional/utah-announces-medical-marijuana-board-members/article_d5ae3f01-db59-54bf-83b5-ad65707fa8c4.html	https://www.heraldextra.com/news/state-and-regional/utah-announces-medical-marijuana-board-members/article_d5ae3f01-db59-54bf-83b5-ad65707fa8c4.html	USA	N	0	1	0	1	2	0	0	1	0	0	0	0	0	0	0	0	0	0	0	0	0	0	0	0	0	0	0	0	0	0	0	0	0	0	0	0	0	0	Neutral	News about Utah's legal aspects	0
142	https://www.abc4.com/news/local-news/number-of-medical-cannabis-processors-wont-be-capped/	https://www.abc4.com/news/local-news/number-of-medical-cannabis-processors-wont-be-capped/	USA	N	1	1	0	1	3	0	0	1	0	0	0	0	0	0	0	0	0	0	0	0	0	0	0	0	0	0	0	0	0	0	0	0	0	0	0	0	0	0	Neutral	News about Utah's legal aspects	0
143	http://www.europarl.europa.eu/news/en/headlines/society/20190207STO25316/medical-cannabis-meps-call-for-research-and-eu-wide-rules	http://www.europarl.europa.eu/news/en/headlines/society/20190207STO25316/medical-cannabis-meps-call-for-research-and-eu-wide-rules	UK	G	0	1	0	1	2	0	0	1	0	0	0	0	1	0	1	0	0	0	0	0	0	0	Alzheimer's disease	0	0	0	0	1	0	0	0	1	0	0	0	Obesity, diabetes and asthma	0	0	Neutral	0	0
144	https://www.bloomberg.com/news/articles/2019-02-15/the-u-k-just-got-its-first-bulk-shipment-of-medical-cannabis	https://www.bloomberg.com/news/articles/2019-02-15/the-u-k-just-got-its-first-bulk-shipment-of-medical-cannabis	USA	N	1	1	0	1	3	0	0	1	0	0	0	0	0	0	0	0	0	0	0	0	1	0	0	0	0	0	0	0	0	0	0	1	0	0	0	0	0	0	Neutral	0	0
145	https://www.washingtonpost.com/national/health-science/a-powerful-new-form-of-medical-marijuana-without-the-high/2016/12/29/81bbf7c0-b5b2-11e6-b8df-600bd9d38a02_story.html	https://www.washingtonpost.com/national/health-science/a-powerful-new-form-of-medical-marijuana-without-the-high/2016/12/29/81bbf7c0-b5b2-11e6-b8df-600bd9d38a02_story.html	USA	N	1	1	1	1	4	0	1	0	0	0	0	0	1	0	1	1	1	1	0	0	1	0	0	0	0	0	0	0	0	0	0	1	0	0	0	Heart diseases	1	0	Positive	0	0
147	https://www.statnews.com/2019/05/30/medical-marijuana-health-care-disparity/	https://www.statnews.com/2019/05/30/medical-marijuana-health-care-disparity/	USA	N	1	1	0	1	3	0	0	1	0	0	0	0	0	1	0	0	0	0	0	0	0	0	Neuropathy	0	0	0	0	0	0	0	1	1	0	0	0	Degenerative joint disease, arthritis and sickle cell anemia	0	0	Positive	0	0
148	https://www.masslive.com/news/2019/06/beginning-july-1-patients-will-get-faster-access-to-medical-marijuana.html	https://www.masslive.com/news/2019/06/beginning-july-1-patients-will-get-faster-access-to-medical-marijuana.html	USA	N	1	1	0	1	3	0	0	1	0	0	0	0	0	0	0	0	0	0	0	0	0	0	0	0	0	0	0	0	0	0	0	0	0	0	0	0	0	0	Neutral	0	0
149	https://www.boisestatepublicradio.org/post/idaho-group-aims-get-medical-marijuana-ballot	https://www.boisestatepublicradio.org/post/idaho-group-aims-get-medical-marijuana-ballot	USA	N	1	1	0	1	3	0	0	1	0	0	0	0	0	0	0	0	0	0	0	0	0	0	0	0	0	0	0	0	0	0	0	0	0	0	0	0	0	0	Neutral	News about Idaho's legal aspects	0
150	https://definitions.uslegal.com/m/medical-marijuana/	https://definitions.uslegal.com/m/medical-marijuana/	USA	O	0	0	0	1	1	0	0	1	0	0	0	0	0	1	1	0	0	0	0	0	0	0	Migraines	1	0	0	1	1	1	0	0	1	0	0	0	Arthritis	0	0	Neutral	it's a law firm	0
151	https://www.standard.co.uk/news/health/first-private-clinic-promises-fastaccess-medical-cannabis-to-londoners-a4169616.html	https://www.standard.co.uk/news/health/first-private-clinic-promises-fastaccess-medical-cannabis-to-londoners-a4169616.html	UK	N	1	1	0	1	3	0	0	1	0	0	0	0	1	0	0	0	0	0	0	0	1	1	Alzheimer's disease	0	0	0	0	0	0	0	0	0	0	0	0	Arthritis and stroke	1	0	Neutral	0	0
152	https://www.tulsaworld.com/news/local/marijuana/still-illegal-one-year-later-things-medical-marijuana-patients-cannot/collection_202aa986-89d0-11e8-8e30-27093d92b291.html	https://www.tulsaworld.com/news/local/marijuana/still-illegal-one-year-later-things-medical-marijuana-patients-cannot/collection_202aa986-89d0-11e8-8e30-27093d92b291.html	USA	N	1	1	0	1	3	0	0	1	0	0	0	0	0	0	0	0	0	0	0	0	0	0	0	0	0	0	0	0	0	0	0	0	0	0	0	0	0	0	Positive	0	0
153	https://www.collingwoodtoday.ca/local-news/store-offering-medical-cannabis-assessments-opening-in-owen-sound-1543049	https://www.collingwoodtoday.ca/local-news/store-offering-medical-cannabis-assessments-opening-in-owen-sound-1543049	Canada	N	0	1	0	1	2	0	0	1	0	0	0	0	0	0	0	0	0	0	0	0	0	0	0	0	0	0	0	0	0	0	0	0	0	0	0	0	0	0	Neutral	News about Ontario's legal aspects	0
154	https://www.labroots.com/trending/health-and-medicine/15097/university-maryland-launch-graduate-degree-cannabis	https://www.labroots.com/trending/health-and-medicine/15097/university-maryland-launch-graduate-degree-cannabis	USA	N	1	1	0	1	3	0	0	0	0	0	0	0	0	0	0	0	0	0	0	0	0	0	0	0	0	0	0	0	0	0	0	0	0	0	0	0	0	0	Neutral	News about new graduation course at Maryland University about medical use of Cannabis	0
157	http://kutv.com/news/local/utah-is-in-2nd-or-3rd-inning-in-prepping-for-medical-marijuana-to-hit-pharmacies	http://kutv.com/news/local/utah-is-in-2nd-or-3rd-inning-in-prepping-for-medical-marijuana-to-hit-pharmacies	USA	N	1	1	0	1	3	0	0	1	0	0	0	0	0	0	0	0	0	0	0	0	0	0	0	0	0	0	0	0	0	0	0	0	0	0	0	0	0	0	Neutral	News about Utah's legal aspects	0
158	https://www.rttnews.com/3010179/tilray-exports-first-bulk-shipment-of-medical-cannabis-oil-to-uk.aspx	https://www.rttnews.com/3010179/tilray-exports-first-bulk-shipment-of-medical-cannabis-oil-to-uk.aspx	USA	N	0	1	0	1	2	0	0	1	0	0	0	0	0	0	0	0	0	0	0	0	0	0	0	0	0	0	0	0	0	0	0	0	0	0	0	0	0	0	Neutral	0	0
160	http://www.newspressnow.com/news/local_news/missouri-to-start-allowing-people-to-apply-for-medical-cannabis/article_e2c652ee-9936-11e9-9e35-13073aab4701.html	http://www.newspressnow.com/news/local_news/missouri-to-start-allowing-people-to-apply-for-medical-cannabis/article_e2c652ee-9936-11e9-9e35-13073aab4701.html	USA	N	1	1	0	1	3	0	0	1	0	0	0	0	0	0	0	0	0	0	0	0	0	0	0	0	0	0	0	0	0	0	0	0	0	0	0	0	0	0	Neutral	News about Missouri's legal aspects	0
161	https://www.healthline.com/health/medical-marijuana	https://www.healthline.com/health/medical-marijuana	UK	HP	1	1	1	1	4	1	0	1	0	0	0	0	1	1	1	0	0	0	0	0	1	0	0	1	0	0	1	1	1	0	0	1	1	0	0	migraine, cachexia	0	1	neutral	0	0
162	https://www.ksl.com/article/46582632/medical-marijuana-growers-vie-for-limited-licenses-in-utah	https://www.ksl.com/article/46582632/medical-marijuana-growers-vie-for-limited-licenses-in-utah	USA	N	1	1	0	1	3	0	0	1	0	0	0	0	0	0	0	0	0	0	0	0	0	0	0	0	0	0	0	0	0	0	0	0	0	0	0	0	0	0	neutral	legislation in utah	0
163	https://www.ky3.com/content/news/MercyCoxhealth-to-not-prescribe-medical-marijuana--511894802.html	https://www.ky3.com/content/news/MercyCoxhealth-to-not-prescribe-medical-marijuana--511894802.html	USA	N	0	1	0	1	2	0	0	1	0	0	0	0	0	0	0	0	0	0	0	0	0	0	0	0	0	0	0	0	0	0	0	0	0	0	0	0	0	0	neutral	Mercy, CoxHealth PRESCRIBING MARIJUANA	0
164	https://www.livescience.com/24554-medical-marijuana.html	https://www.livescience.com/24554-medical-marijuana.html	USA	N	1	1	0	1	3	0	1	1	0	0	1	0	1	1	1	0	0	1	mental illness and addiction	0	1	0	alzheimer's	1	0	0	0	1	1	0	0	1	1	1	1	0	0	1	neutral	0	0
165	http://theconversation.com/medical-cannabis-users-could-still-be-criminalised-in-uk-despite-government-accepting-its-benefits-100356	http://theconversation.com/medical-cannabis-users-could-still-be-criminalised-in-uk-despite-government-accepting-its-benefits-100356	UK	N	1	1	1	1	4	0	0	1	0	0	0	0	1	0	1	0	0	0	0	0	1	0	0	0	0	0	0	0	0	0	0	1	0	0	1	arthritis	0	0	neutral	uk legislation	0
166	https://www.timesrecord.com/articles/business/with-planning-board-approval-medical-marijuana-store-on-track-to-open-in-brunswick-this-summer/	https://www.timesrecord.com/articles/business/with-planning-board-approval-medical-marijuana-store-on-track-to-open-in-brunswick-this-summer/	USA	N	1	1	0	1	3	0	0	0	0	0	0	0	0	0	0	0	0	0	0	0	0	0	0	0	0	0	0	0	0	0	0	0	0	0	0	0	0	0	neutral	opening of brunswick store	0
167	https://www.miamiherald.com/news/nation-world/world/americas/article230916353.html	https://www.miamiherald.com/news/nation-world/world/americas/article230916353.html	USA	N	1	1	0	1	3	0	0	1	1	0	0	0	0	0	0	0	0	0	0	0	0	0	0	0	0	0	0	0	0	0	0	0	0	0	0	0	1	0	neutral	marijuana allowed in jamaica	0
168	https://lovinmalta.com/news/news-politics/malta-is-a-medical-cannabis-success-story-joseph-muscat-gives-keynote-speech-at-cannabis-europe-in-london/	https://lovinmalta.com/news/news-politics/malta-is-a-medical-cannabis-success-story-joseph-muscat-gives-keynote-speech-at-cannabis-europe-in-london/	Malta	O	1	1	0	1	3	0	0	1	0	0	0	0	0	0	0	0	0	0	0	0	0	0	0	0	0	0	0	0	0	0	0	0	0	0	0	0	0	0	neutral	cannabis allowed in malta	0
169	https://www.sciencedaily.com/releases/2018/09/180910173731.htm	https://www.sciencedaily.com/releases/2018/09/180910173731.htm	USA	N	0	1	1	1	3	0	1	0	0	0	0	0	1	0	1	1	1	0	PTSD	1	0	0	0	1	0	0	0	0	0	0	0	1	0	0	0	0	0	1	neutral	0	0
170	https://www.thesun.co.uk/news/6559385/medical-marijuana-uk-legal-treatment-sativex/	https://www.thesun.co.uk/news/6559385/medical-marijuana-uk-legal-treatment-sativex/	UK	N	1	1	0	1	3	0	0	1	0	0	0	0	1	1	1	1	0	0	0	1	1	0	0	1	0	0	0	1	0	0	0	1	0	0	0	0	1	0	neutral	UK legislation	0
171	https://edition.cnn.com/2018/11/01/health/uk-medical-marijuana-cannabis-legal-intl/index.html	https://edition.cnn.com/2018/11/01/health/uk-medical-marijuana-cannabis-legal-intl/index.html	UK	N	1	1	1	1	4	0	0	1	1	0	0	0	1	0	1	1	1	0	PTSD, OCD	0	1	0	STROKE, DEMENTIA, BRAIN INJURY	1	1	0	0	1	0	0	1	1	1	0	1	0	0	0	neutral	uk legislation	0
172	https://www.vox.com/policy-and-politics/2019/6/11/18660351/medical-marijuana-opioid-epidemic-overdose-study	https://www.vox.com/policy-and-politics/2019/6/11/18660351/medical-marijuana-opioid-epidemic-overdose-study	USA	N	1	1	1	1	4	0	1	1	0	0	0	0	0	0	0	0	0	0	0	0	0	0	0	0	0	0	0	0	0	0	0	0	0	0	0	0	0	0	neutral	marijuana not helping combat opioid epidemic	0
173	https://www.businessinsider.com/medical-marijuana-insomnia-first-time-2019-6	https://www.businessinsider.com/medical-marijuana-insomnia-first-time-2019-6	USA	N	1	1	0	1	3	0	0	1	0	0	0	0	0	0	0	0	0	0	0	1	0	0	0	0	0	0	0	0	0	0	0	1	0	0	0	0	0	1	positive	personal story with marijuana	0
176	https://www.sandoz.com/stories/access-medicines/pioneering-treatment-options-how-medical-cannabis-improves-patients%27-lives	https://www.sandoz.com/stories/access-medicines/pioneering-treatment-options-how-medical-cannabis-improves-patients%27-lives	Germany	C	0	1	1	1	3	0	1	1	1	0	0	0	1	0	1	1	1	0	0	0	0	0	migraine and seizures	1	0	0	0	1	0	0	0	0	1	1	1	eessential tremors - NEUROPROTECTIVE, ANTI-PSYCHOTIC, ANTIOXIDANT, ANTIEMETIC	0	0	neutral	opioid epidemic	0
177	https://www.texastribune.org/2019/05/17/texas-senate-medical-cannabis-expansion-bill/	https://www.texastribune.org/2019/05/17/texas-senate-medical-cannabis-expansion-bill/	USA	N	1	1	0	1	3	0	0	1	1	0	0	0	1	0	1	0	0	0	PTSD	0	1	0	seizure disorders, ALS, autism	1	0	0	0	0	0	0	0	0	0	0	0	0	0	0	neutral	0	0
178	https://www.mirror.co.uk/news/politics/medical-cannabis-prescription-available-uk-13514178	https://www.mirror.co.uk/news/politics/medical-cannabis-prescription-available-uk-13514178	UK	N	1	1	0	1	3	0	0	1	1	0	0	0	1	0	1	0	0	0	0	0	1	0	0	1	0	0	0	0	0	0	0	1	1	0	0	0	0	0	neutral	0	0
179	https://www.openaccessgovernment.org/medicinal-benefits-of-cbd/64896/	https://www.openaccessgovernment.org/medicinal-benefits-of-cbd/64896/	UK	N	0	1	1	1	3	0	1	1	0	0	0	0	1	0	1	1	0	1	dementia, tobacco and opioid dependence, attention-deficit hyperactivity disorder, Tourette’s disorder	0	1	1	0	1	0	0	1	0	0	1	0	1	1	0	1	arthritis, dystonia, dravet syndrome	0	0	positive	0	0
180	https://blogs.spectator.co.uk/2019/05/does-the-uk-really-have-medical-marijuana/	https://blogs.spectator.co.uk/2019/05/does-the-uk-really-have-medical-marijuana/	UK	N	1	1	0	1	3	0	0	1	0	0	0	0	0	0	0	0	0	0	0	0	1	0	0	0	0	0	0	0	0	0	0	1	0	0	0	0	0	0	neutral	uk legislation	0
182	https://www.visualcapitalist.com/history-medical-cannabis-shown-one-giant-map/	https://www.visualcapitalist.com/history-medical-cannabis-shown-one-giant-map/	USA	N	1	1	0	1	3	0	0	0	0	0	0	0	1	0	1	1	0	0	0	0	0	0	0	0	0	0	0	0	0	0	0	1	1	1	0	rheumatism, gout, malaria, rabies, bronchitis, toothache, earaches, alleviation of labor pains, migraines, asthma, dysentery (history)	0	0	Neutral	history of marijuana	0
183	https://www.drugbank.ca/drugs/DB14009	https://www.drugbank.ca/drugs/DB14009	Canada	HP	0	1	1	1	3	0	1	0	0	0	0	0	1	0	0	1	0	1	0	0	0	0	0	1	0	0	0	1	0	0	0	1	1	1	1	0	0	1	neutral	pharmacology	0
184	https://jamanetwork.com/journals/jama/fullarticle/2338239	https://jamanetwork.com/journals/jama/fullarticle/2338239	USA	S	1	1	1	1	4	0	1	0	0	0	0	0	0	0	0	0	0	0	0	0	0	0	0	0	0	0	0	0	0	0	0	0	0	0	0	0	0	0	NEUTRAL	labelling in edible cannabis products	0
185	https://www.wvtf.org/post/where-virginias-medical-cannabis-program-goes-here	https://www.wvtf.org/post/where-virginias-medical-cannabis-program-goes-here	USA	N	1	1	0	1	3	0	0	1	0	0	0	0	1	0	0	0	0	0	0	0	1	0	0	0	0	0	0	0	0	0	0	1	0	0	0	0	0	0	neutral	virginia´s legislation	0
187	https://coloradosun.com/2019/06/12/colorado-medical-marijuana-recreational-marijuana-stats/	https://coloradosun.com/2019/06/12/colorado-medical-marijuana-recreational-marijuana-stats/	USA	N	1	1	0	1	3	0	0	1	0	0	0	0	1	0	1	1	0	0	PTSD	0	0	0	0	0	0	0	0	0	0	0	0	1	1	0	0	0	1	0	neutral	us legislation	0
189	https://bmcfampract.biomedcentral.com/articles/10.1186/s12875-019-0906-y	https://bmcfampract.biomedcentral.com/articles/10.1186/s12875-019-0906-y	USA	S	1	1	1	1	4	0	1	1	0	0	0	0	0	1	1	1	1	0	PTSD, autism	1	1	0	ALS	1	1	0	0	1	1	0	0	1	1	0	1	terminal illness, reduction in opioid consumption, cachexia, Tourette syndrome, obstructive sleep apnea, tics, seizures	0	0	neutral	0	0
190	https://www.ukcia.org/medical/index.php	https://www.ukcia.org/medical/index.php	UK	O	0	0	0	0	0	0	0	0	1	0	0	0	0	0	0	0	0	0	0	0	1	0	0	0	0	0	0	0	0	0	0	0	0	0	0	0	0	0	POSITIVE	Activism	0
191	https://www.montgomeryadvertiser.com/story/news/2019/05/09/alabama-senate-approves-medical-marijuana-bill/1151398001/	https://www.montgomeryadvertiser.com/story/news/2019/05/09/alabama-senate-approves-medical-marijuana-bill/1151398001/	USA	N	1	1	0	1	3	0	0	1	0	0	0	0	0	0	0	0	0	0	0	0	0	0	0	0	0	0	0	0	0	0	0	0	0	0	0	seizures, reduction in opioid consumption, arthritis	0	0	neutral	alabama legislation	0
192	https://www.huckmag.com/perspectives/activism-2/a-definitive-guide-to-the-history-of-medical-cannabis/	https://www.huckmag.com/perspectives/activism-2/a-definitive-guide-to-the-history-of-medical-cannabis/	UK	N	1	1	0	1	3	0	0	0	0	0	0	0	1	1	0	0	1	0	0	0	1	0	0	0	0	0	0	1	1	0	0	1	0	1	1	malaria, dysentery, constipation and rheumatic pains, fever, pain and uterine contraction, rabies, rheumatism, infantile convulsions, cholera, tetanus and delirium in alcohol withdrawal, asthma (history)	0	0	positive	history of marijuana	0
194	https://news.umich.edu/many-users-prefer-medical-marijuana-over-prescription-drugs/	https://news.umich.edu/many-users-prefer-medical-marijuana-over-prescription-drugs/	USA	P	1	1	1	1	4	0	1	1	0	0	0	0	0	0	0	0	1	0	0	0	0	0	0	0	0	0	0	0	0	0	0	1	0	0	0	back problems, headaches	0	0	neutral	0	0
195	https://sciencebasedmedicine.org/medical-marijuana-where-is-the-evidence/	https://sciencebasedmedicine.org/medical-marijuana-where-is-the-evidence/	USA	O	1	1	1	1	4	0	1	1	0	0	0	0	1	1	1	1	0	0	0	0	1	0	0	1	0	0	0	1	1	0	1	1	1	0	1	osteoarthritis	0	1	positive	0	0
196	https://time.com/3931863/medical-marijuana-benefits/	https://time.com/3931863/medical-marijuana-benefits/	USA	N	1	1	0	1	3	0	1	1	0	0	0	0	0	1	0	1	1	1	0	1	1	0	0	1	0	0	0	1	1	0	0	1	1	0	1	Tourette syndrome	0	1	neutral	0	0
197	https://www.acponline.org/system/files/documents/about_acp/chapters/mn/15mtg/reznikoff.pdf	https://www.acponline.org/system/files/documents/about_acp/chapters/mn/15mtg/reznikoff.pdf	USA	P	1	1	1	1	4	0	0	1	0	0	0	0	0	1	1	0	0	0	0	0	1	0	ALS	1	1	0	0	0	1	0	0	1	1	0	1	seizures, tourette syndrome, terminal illness, cachexia	1	1	neutral	0	0
198	https://www.liebertpub.com/doi/10.1089/can.2018.0020	https://www.liebertpub.com/doi/10.1089/can.2018.0020	USA	S	1	1	1	1	4	0	1	0	0	0	0	0	0	0	0	1	1	0	0	0	0	0	0	0	0	0	0	0	0	0	0	1	0	0	0	Migraine,	0	0	neutral	bezodiazepine reduction	0
199	https://labblog.uofmhealth.org/lab-report/what-drives-patients-to-use-medical-marijuana-mostly-chronic-pain	https://labblog.uofmhealth.org/lab-report/what-drives-patients-to-use-medical-marijuana-mostly-chronic-pain	USA	P	1	1	1	1	4	0	1	1	0	0	0	0	0	0	0	0	0	0	0	0	1	0	0	1	0	0	0	0	0	0	0	1	1	0	1	0	0	0	neutral	0	0
200	https://www.pharmaceutical-journal.com/opinion/comment/why-patients-are-still-being-denied-legalised-medical-cannabis/20206256.article	https://www.pharmaceutical-journal.com/opinion/comment/why-patients-are-still-being-denied-legalised-medical-cannabis/20206256.article	UK	S	1	1	1	1	4	0	1	1	0	0	0	0	1	0	0	0	0	0	0	0	0	0	0	0	0	0	0	0	0	0	0	1	0	0	0	reduction in opioid consumption	0	0	positive	uk legislation	0
201	https://www.abc.net.au/news/health/2019-02-20/medical-marijuana-whats-the-evidence-for-treating-illness/10823036	https://www.abc.net.au/news/health/2019-02-20/medical-marijuana-whats-the-evidence-for-treating-illness/10823036	Australia	N	1	1	1	1	4	0	0	0	0	0	0	0	1	0	1	1	0	0	0	0	1	0	0	0	0	0	1	0	0	0	0	1	1	0	1	terminal illness	0	0	neutral	0	0
202	https://news.wttw.com/2019/05/23/if-pot-legalized-illinois-what-happens-medical-marijuana	https://news.wttw.com/2019/05/23/if-pot-legalized-illinois-what-happens-medical-marijuana	USA	N	1	1	0	1	3	0	0	1	0	0	0	0	0	0	0	0	0	0	0	0	0	0	0	0	0	0	0	0	0	0	0	0	0	0	0	reduction in opioid consumption	0	0	neutral	illinois legislation	0
203	https://badgut.org/information-centre/a-z-digestive-topics/cannabis/	https://badgut.org/information-centre/a-z-digestive-topics/cannabis/	Canada	NP	0	0	1	1	2	0	1	1	0	0	0	0	1	0	1	1	0	0	0	0	1	0	0	0	1	non-alcoholic fatty liver disease	0	1	0	0	0	1	1	1	1	hemorrhoids and ease childbirth, easy anxiety and increase happiness. insomnia, asthma, menstrual cramps (history). MIGRAINE	0	1	NEUTRAL	0	0
204	https://www.npr.org/sections/health-shots/2018/05/10/610039787/when-cancer-patients-ask-about-weed-many-doctors-say-go-for-it	https://www.npr.org/sections/health-shots/2018/05/10/610039787/when-cancer-patients-ask-about-weed-many-doctors-say-go-for-it	USA	N	1	1	1	1	4	0	1	1	0	0	0	0	0	0	1	0	0	0	0	0	0	0	0	0	0	0	0	1	0	0	0	1	1	0	1	0	0	0	neutral	0	0
205	https://www.rxlist.com/consumer_medical_marijuana_cannabis/drugs-condition.htm	https://www.rxlist.com/consumer_medical_marijuana_cannabis/drugs-condition.htm	USA	HP	1	0	1	1	3	1	0	1	0	0	0	0	1	1	1	1	0	1	PTSD	0	1	1	Alzheimers, stroke	0	0	0	0	1	1	1	0	1	1	1	0	rheumatoid arthritis, treatment for drug addiction	0	1	neutral	0	0
206	https://hansard.parliament.uk/Commons/2019-04-08/debates/AFF73549-D16F-40D6-9BE2-4FD68DFF7054/AccessToMedicalCannabis	https://hansard.parliament.uk/Commons/2019-04-08/debates/AFF73549-D16F-40D6-9BE2-4FD68DFF7054/AccessToMedicalCannabis	UK	G	0	1	0	1	2	0	0	1	0	0	0	0	1	1	1	0	0	1	0	0	1	1	0	0	1	0	0	0	0	0	0	1	0	0	0	muscular dystrophy, arthritis	1	0	positive	0	0
207	https://labiotech.eu/sponsored/medical-cannabis-europe-brexit/	https://labiotech.eu/sponsored/medical-cannabis-europe-brexit/	Germany	N	1	1	1	1	4	0	0	1	0	0	0	0	0	0	0	0	0	0	0	0	0	0	0	0	0	0	0	0	0	0	0	0	0	0	0	0	0	0	neutral	EU legislation	0
209	https://www.medicalnewstoday.com/articles/322283.php	https://www.medicalnewstoday.com/articles/322283.php	UK	N	1	1	0	1	3	1	0	1	0	0	0	0	1	0	0	0	0	0	0	0	0	0	0	0	0	0	0	0	0	0	0	0	0	0	0	0	0	1	neutral	0	0		medical association
210	https://www.healthdirect.gov.au/medicinal-cannabis	https://www.healthdirect.gov.au/medicinal-cannabis	Australia	G	0	1	1	1	3	1	0	1	0	0	0	0	1	1	0	0	0	0	0	0	1	0	0	0	0	0	0	0	0	0	0	1	1	1	1	palliative care	0	1	neutral	0	0		university
213	https://www.cbc.ca/news/business/medical-pot-shortages-1.4887318	https://www.cbc.ca/news/business/medical-pot-shortages-1.4887318	Canada	N	1	1	0	1	3	0	0	0	0	0	0	0	0	0	0	1	0	0	ADHD and borderline personality disorder.	0	0	0	0	0	0	digestive disorders	0	0	0	0	0	0	0	0	0	seizures	0	0	neutral	canada's shortage	0
214	https://www.kivitv.com/news/group-to-try-again-with-medical-marijuana-initiative	https://www.kivitv.com/news/group-to-try-again-with-medical-marijuana-initiative	USA	N	1	1	0	1	3	0	0	1	0	0	0	0	0	0	0	0	0	0	0	0	0	0	0	0	0	0	0	0	0	0	0	1	0	0	0	peripheral neuropathy	0	0	neutral	idaho legislation	0
215	https://sensiseeds.com/en/info/company/about-sensi-seeds/sensi-seeds-and-medicinal-cannabis/what-is-medicinal-cannabis/	https://sensiseeds.com/en/info/company/about-sensi-seeds/sensi-seeds-and-medicinal-cannabis/what-is-medicinal-cannabis/	Netherlands	C	0	0	0	1	1	0	0	0	0	1	0	0	0	0	0	0	0	0	0	0	0	0	0	0	0	0	0	0	0	0	0	0	0	0	0	0	0	0	positive	seeds selling	0
216	https://www.aacap.org/AACAP/Policy_Statements/2012/AACAP_Medical_Marijuana_Policy_Statement.aspx	https://www.aacap.org/AACAP/Policy_Statements/2012/AACAP_Medical_Marijuana_Policy_Statement.aspx	USA	P	1	1	1	1	4	0	1	0	0	0	0	0	0	0	0	0	0	0	0	0	0	0	0	0	0	0	0	0	0	0	0	0	0	0	0	0	0	1	negative	risks of marijuana on youth	0
217	https://yle.fi/uutiset/osasto/news/medical_marijuana_trend_slow_to_take_off_in_finland/10511557	https://yle.fi/uutiset/osasto/news/medical_marijuana_trend_slow_to_take_off_in_finland/10511557	Finland	N	0	1	0	1	2	0	0	1	0	0	0	0	1	0	0	0	0	0	0	0	1	0	0	1	0	0	0	0	0	0	0	1	0	1	0	arthritis	0	0	neutral	finland legislation	0
225	https://www.koco.com/article/medical-marijuana-sales-soaring-in-oklahoma-top-dollar23m-in-may/27843098	https://www.koco.com/article/medical-marijuana-sales-soaring-in-oklahoma-top-dollar23m-in-may/27843098	USA	N	0	1	0	1	2	0	0	1	0	0	0	0	0	0	0	0	0	0	0	0	0	0	0	0	0	0	0	0	0	0	0	0	0	0	0	0	1	0	neutral	oklahoma sales	0
226	https://www.wikidoc.org/index.php/Medical_cannabis	https://www.wikidoc.org/index.php/Medical_cannabis	USA	HP	1	1	1	1	4	0	1	1	0	0	0	0	1	1	1	1	1	0	PTSD, obsessive-compulsive disorder, panic disorder, and bipolar disorder	1	1	0	0	1	0	0	1	1	1	1	0	1	1	0	1	, MIGRAINE, atherosclerosis, antiemetic, hepatitis, spinal and skeletal disorders, asthma, premenstrual syndrome, hypertension	0	1	NEUTRAL	0	0
228	https://themighty.com/2018/11/medical-marijuana-cannabis-uk/	https://themighty.com/2018/11/medical-marijuana-cannabis-uk/	UK	O	1	1	0	1	3	0	0	1	0	0	0	0	1	0	0	0	0	0	0	0	1	0	0	1	0	0	0	0	0	0	0	0	1	0	1	0	0	0	neutral	uk legislation, seems a news or a blog where all can write	0
230	https://www.dinafem.org/en/blog/medical-cannabis-available-on-prescription-uk/	https://www.dinafem.org/en/blog/medical-cannabis-available-on-prescription-uk/	UK	C	1	1	0	1	3	0	0	1	0	1	0	0	1	0	0	0	0	0	0	0	0	0	0	0	0	0	0	0	0	0	0	0	0	0	0	0	0	0	Positive	UK LEGISLATION	0
231	https://metro.co.uk/2018/10/29/everything-you-need-to-know-about-medicinal-cannabis-and-its-benefits-8054450/	https://metro.co.uk/2018/10/29/everything-you-need-to-know-about-medicinal-cannabis-and-its-benefits-8054450/	UK	N	1	1	0	1	3	0	1	1	0	0	0	0	1	1	1	1	1	0	PTSD	1	1	1	0	1	1	0	1	1	1	0	1	1	1	0	1	muscle relaxant, endometriosis, interstitial cystitis, rheumatoid arthritis	0	0	neutral	0	0
232	https://www.medicalcannabisseedsbank.com/blog/medical-marihuana-c4.html	https://www.medicalcannabisseedsbank.com/blog/medical-marihuana-c4.html	UK	C	0	0	0	1	1	0	0	0	0	1	0	0	1	0	1	1	1	0	PTSD, ADD, ADHD	1	1	1	0	1	1	1	1	1	1	0	1	1	1	1	0	ARTHRITIS, ASTHMA, MIGRAINES, pms, HEADACHES, FATIGUE, CRAMPS	1	0	positive	seeds selling	0
233	https://thethirdwave.co/psychedelics/cannabis/medical-marijuana/	https://thethirdwave.co/psychedelics/cannabis/medical-marijuana/	USA	O	0	1	0	1	2	0	0	1	0	0	0	0	1	1	1	1	1	1	PTSD, ADHD	1	1	0	Alzheimers	1	1	cachexia	1	1	1	0	1	1	1	0	0	migaines, sleep apnea, arthritis, fatigue	0	1	positive	0	0
236	https://www.thejournal.ie/medicinal-cannabis-access-scheme-4697671-Jun2019/	https://www.thejournal.ie/medicinal-cannabis-access-scheme-4697671-Jun2019/	Ireland	N	0	1	0	1	2	0	0	1	0	0	0	0	1	0	0	0	0	0	0	0	1	0	0	1	0	0	0	0	0	0	0	0	1	0	1	0	0	0	neutral	ireland legislation	0
237	https://medical-dictionary.thefreedictionary.com/Cannbis	https://medical-dictionary.thefreedictionary.com/Cannbis	USA	O	0	0	1	1	2	0	0	0	0	0	0	0	0	0	1	0	0	0	0	0	0	0	0	0	0	0	1	0	0	0	0	0	0	0	1	0	0	0	neutral	definition of cannabis	0
240	https://medicalmarijuana.co.uk/legal/uk-medical-cannabis-guidelines/	https://medicalmarijuana.co.uk/legal/uk-medical-cannabis-guidelines/	UK	O	0	0	0	0	0	0	0	1	1	0	0	0	0	0	0	0	0	0	0	0	1	0	0	1	0	0	0	0	0	0	0	0	0	0	0	0	0	0	positive	UK Cannabis Legal Guidelines	0
241	https://www.cannvas.me/News/Regulatory/UK-To-Legalize-Medical-Cannabis	https://www.cannvas.me/News/Regulatory/UK-To-Legalize-Medical-Cannabis	UK	O	0	1	1	1	3	0	0	1	1	0	0	0	1	0	0	0	0	0	0	0	0	0	0	0	0	0	0	0	0	0	0	0	0	0	0	0	0	0	positive	UK legislation	0
242	https://www.joe.co.uk/news/government-to-officially-review-cannabis-for-medicinal-use-185034	https://www.joe.co.uk/news/government-to-officially-review-cannabis-for-medicinal-use-185034	UK	N	1	0	0	1	2	0	0	1	0	0	0	0	1	0	0	0	0	0	0	0	0	0	0	0	0	0	0	0	0	0	0	0	0	0	0	0	0	0	neutral	UK legislation	0
